# Supplementary material
Source: publisher site journal article supplement (https://www.dovepress.com/article/supplementary_file/555129/555129_Appendix%201.docx)
Supplement: Supplementary file 1 [file 555129_Appendix%201.docx]

**Instrument**

Due to the Muslim majority in Jordan, two additional options were added to the subscales: for alcohol consumption, “I absolutely do not drink alcohol,” and for low-salt intake, “I absolutely do not eat ham meat.”
